# Supplementary material for: Observation of guanidine–carbon dioxide complexation in solution and its role in the reaction of carbon dioxide and propargylamines
Source: Royal Society of Chemistry journal article supplement (doi:10.1039/c4cy00480a), 2014-01-01
Supplement: c4cy00480a1.pdf [file c4cy00480a1.pdf]

**Observation of Guanidine-Carbon Dioxide Complexation in Solution and  
Its Role in Reaction of Carbon Dioxide and Propargylamines**

*Rachel Nicholls, Simon Kaufhold and Bao N. Nguyen\**

## General Information

Anhydrous solvents were obtained by expression through an activated alumina column built after procedure described by Grubbs.<sup>1</sup> All other compounds and anhydrous solvents were purchased from Sigma Aldrich and VWR, and used as supplied without any further purification. Unless otherwise specified, CO<sub>2</sub> was of research grade from BOC, and was dried by passing through a silica gel drying tube before use.

NMR spectra were recorded in chloroform-*d* on Bruker AV400 spectrometers. Chemical shifts were calibrated using the chloroform signal.

Compound **1a** was prepared according to Gabriele and Costa.<sup>2</sup> MTBD.HCl was prepared according to Joseph *et al.*<sup>3</sup>

## Complexation Experiments

*Typical procedure:* A MultiMaxIR™ reactor was cleaned and dried before being flushed with nitrogen for 10 minutes. Anhydrous THF (20 mL) was introduced via a septum, followed by the organic base (20 μL or 20 mg in the case of DABCO). The solution was stirred at 25 °C and 750 rpm for 10 minutes. Collection of IR spectra for the 500-4000 cm<sup>-1</sup> range was started. Spectra were collected every 30 seconds, each consisted of 44 scans, at 8 cm<sup>-1</sup> resolution. After 300 seconds, CO<sub>2</sub> was introduced via a balloon and a separated needle to facilitate the replacement of nitrogen with CO<sub>2</sub>. When relevant, addition of EtOH (2 mL) or water (50 μL) was carried out after an additional 300 seconds.

Acetonitrile was found to be unsuitable for the experiment due to significant precipitation upon treating TBD and MTBD with CO<sub>2</sub>.

*TBD + CO<sub>2</sub>*

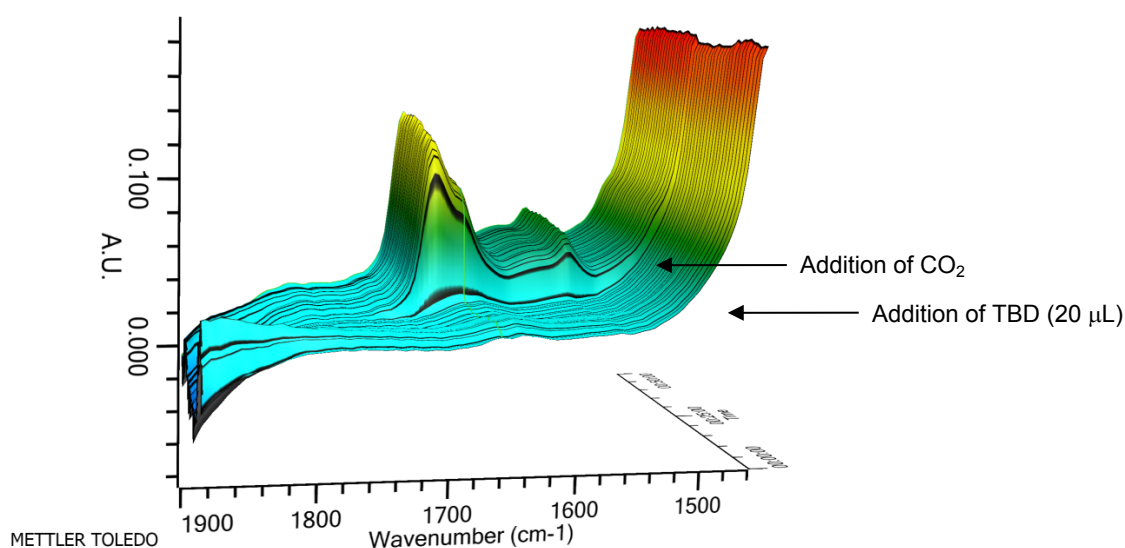

MTBD + CO<sub>2</sub>

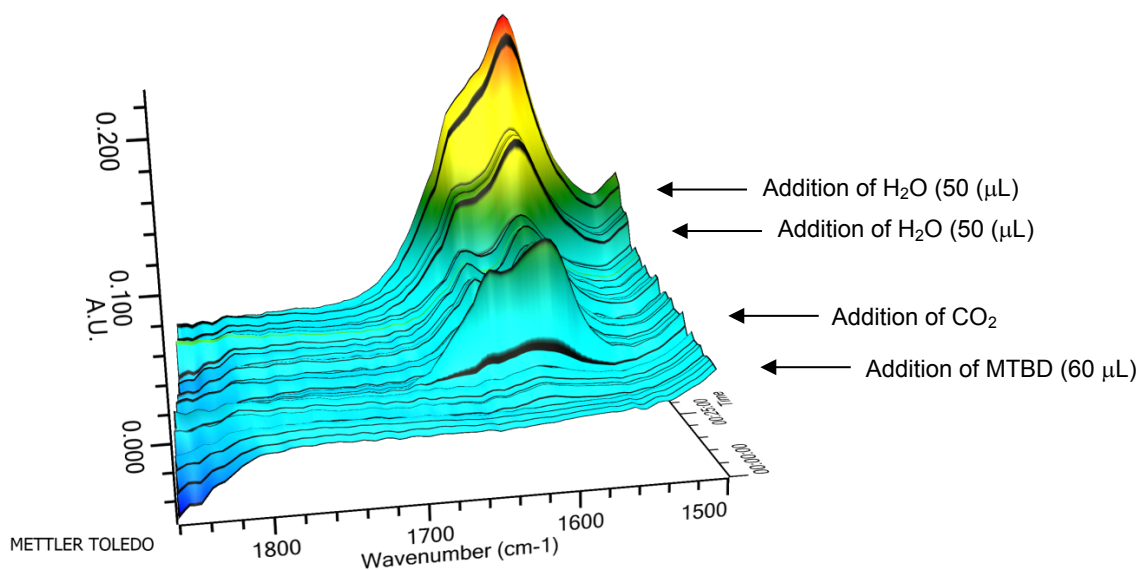

MTBD.CO<sub>2</sub> + EtOH

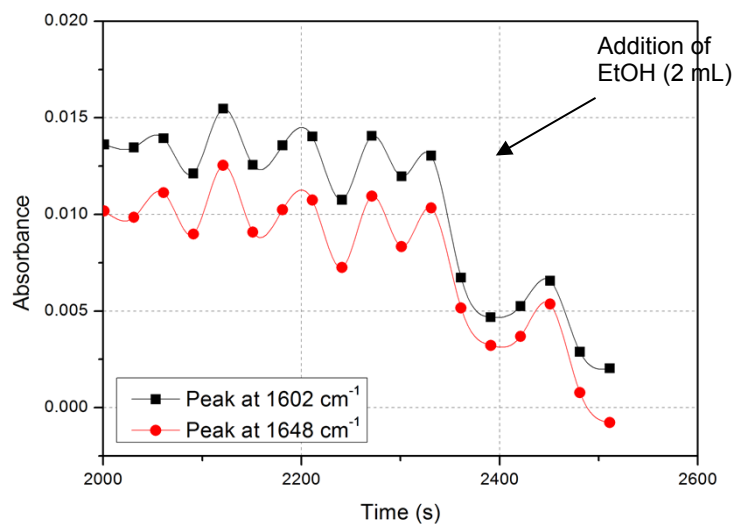

TMG + CO<sub>2</sub>, DABCO + CO<sub>2</sub> and TEA + CO<sub>2</sub>

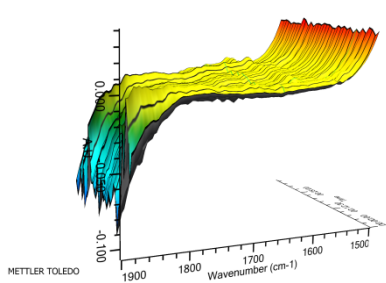

TMG (20 μL)

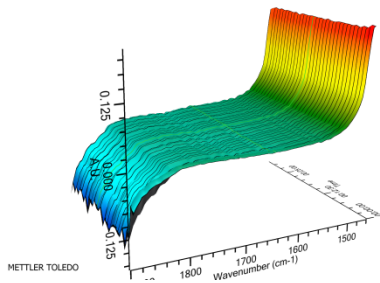

DABCO (20 mg)

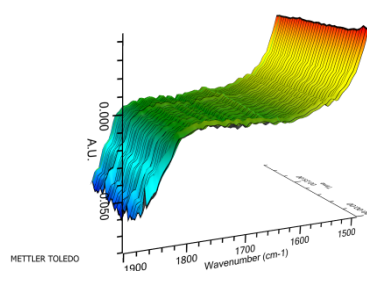

TEA (20 μL)

*MTBD.HCl in THF*

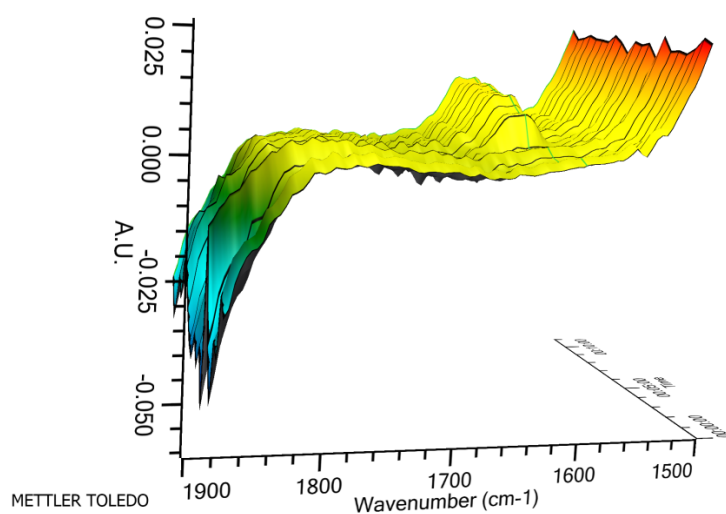

IR freq. 1620, 1603  $\text{cm}^{-1}$

### Computational Study

Molecular modelling was performed using Gaussian 09 package<sup>4</sup> on the Chemistry SCAN (Supercomputer at Night) Cluster at Imperial College London. The optimised structure of some amine/guanidine- $\text{CO}_2$  complexes are displayed below.

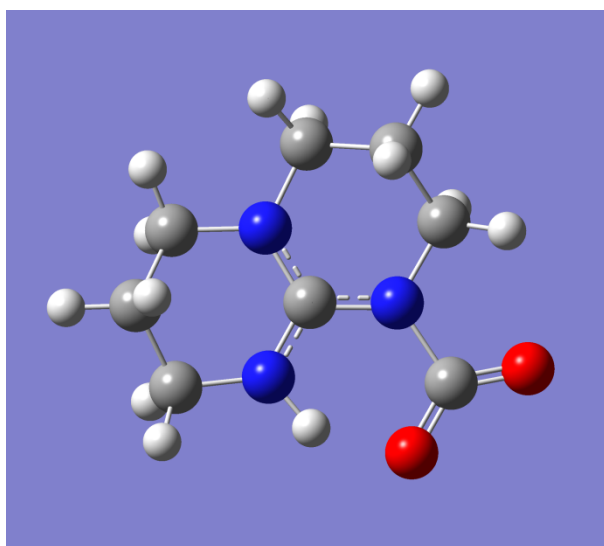

TBD. $\text{CO}_2$  MP2/6-311G(d,p)

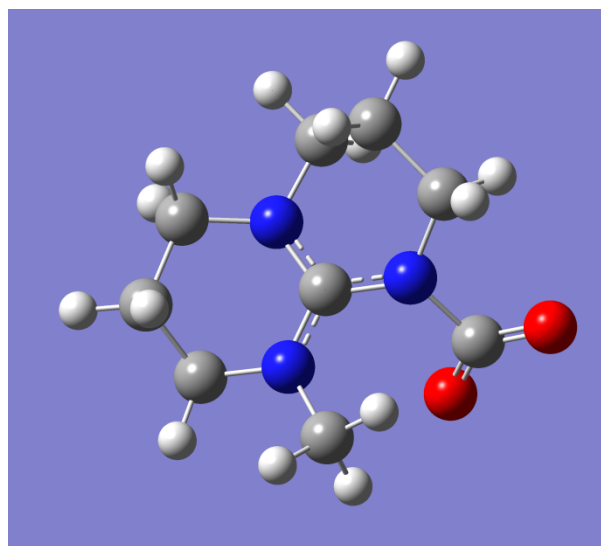

MTBD. $\text{CO}_2$  MP2/6-311G(d,p)

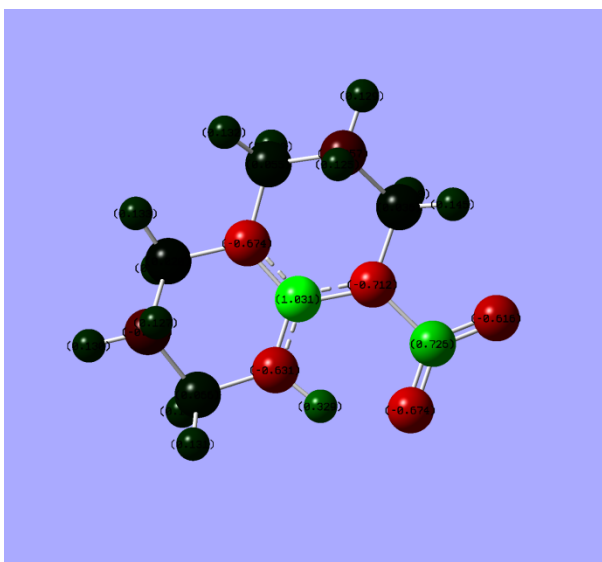

TBD.CO<sub>2</sub> Mulliken charges map

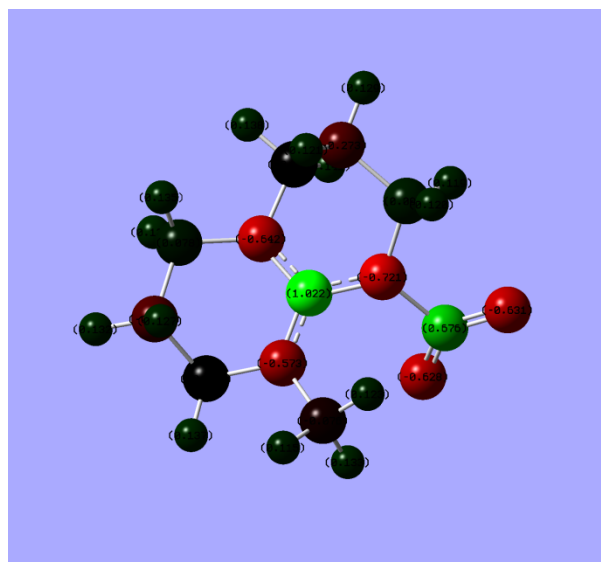

MTBD.CO<sub>2</sub> Mulliken charges map

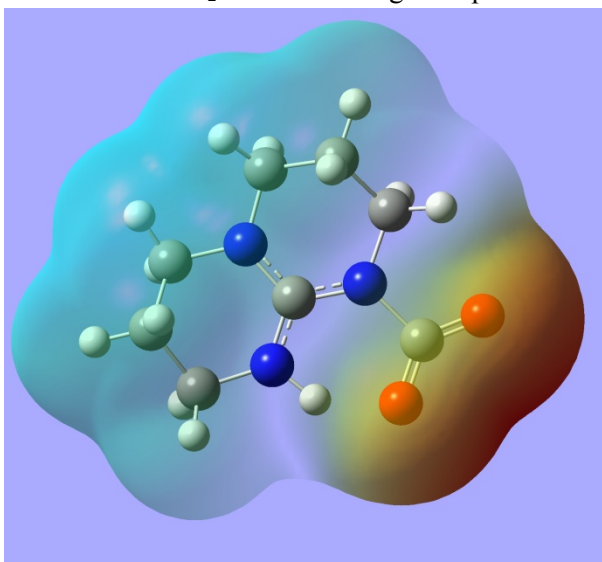

TBD.CO<sub>2</sub> Electrostatic potential map

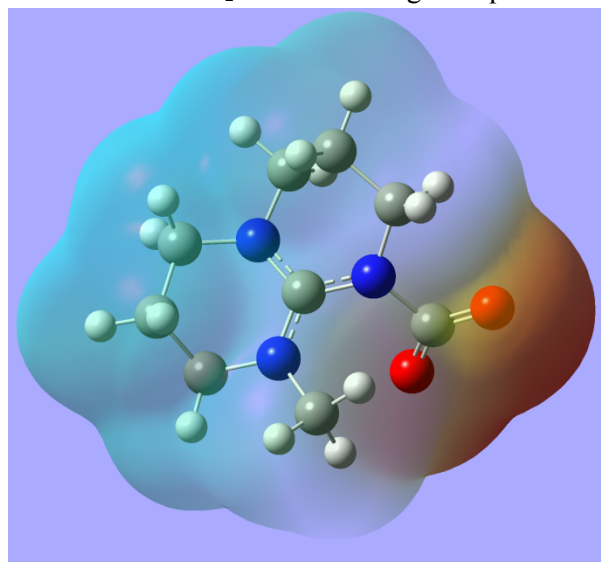

TBD.CO<sub>2</sub> Electrostatic potential map

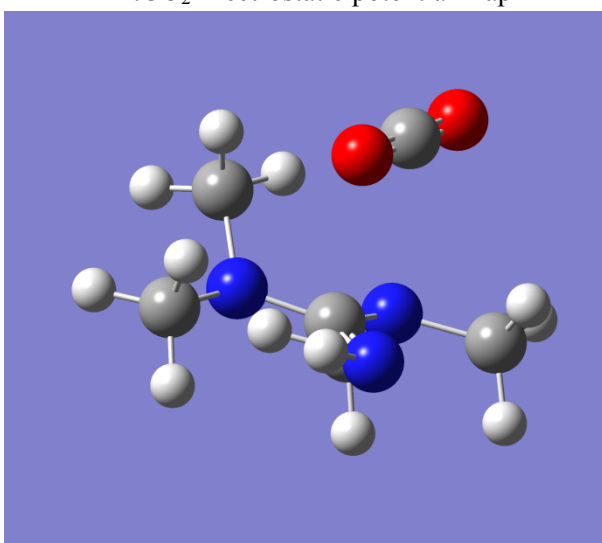

TMG.CO<sub>2</sub> MP2/6-311G(d,p)

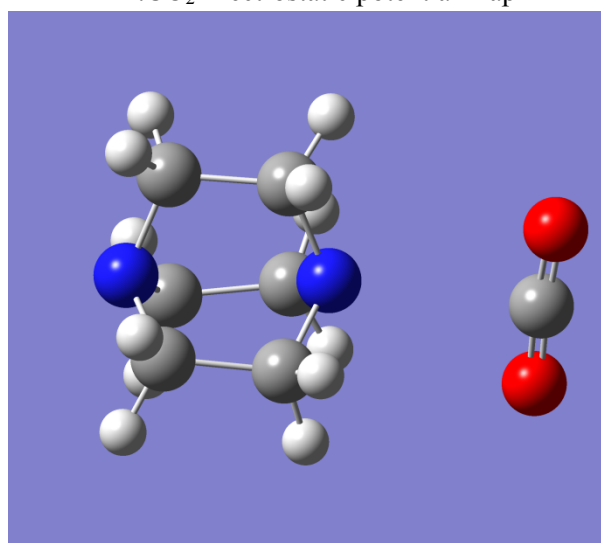

DABCO.CO<sub>2</sub> MP2/6-311G(d,p)

## Typical Procedure for Preliminary Small-Scale Catalytic Reaction between **1a** and CO<sub>2</sub>

An Endeavor™ multi-well hydrogenator from Biotage® was adapted for reactions using research grade CO<sub>2</sub> supplied by BOC (10 bar, containing < 0.5% H<sub>2</sub>O, which was then passed through a silica gel drying column before use) at low to medium pressure. A dry reaction vessel containing **1a** (50 mg, 0.29 mmole) was charged with dry solvent (1 mL) and assembled into the equipment. The reaction was purged three times with nitrogen and pressurized with CO<sub>2</sub> (2 bar) for 15 minutes. After the pressure equilibrated, the vessel was heated to 50 °C and the pressure of CO<sub>2</sub> raised to 5 bar. The reaction was allowed to equilibrate for 15 minutes before stirring (500 rpm) is started. After 18 hours, the reaction vessel was purged with nitrogen and a crude <sup>1</sup>H NMR spectrum was measured after solvent evaporation. The crude yield was determined by normalising the integration of the benzyl CH<sub>2</sub> signals in the product and the starting material.

The product of MTBD/MeCN reaction was purified with flash chromatography on silica gel using EtOAc/DCM (60:40) as eluent, giving product **2a** (0.51 g) in 81% isolated yield.

<sup>1</sup>H NMR (400 MHz, CDCl<sub>3</sub>) δ 7.38-7.25 (m, 5H), 4.69 (d, *J* 3.4, 1H), 4.47 (s, 2H), 4.24 (d, *J* 3.4, 1H), 1.33 (s, 6H); <sup>13</sup>C NMR (100 MHz, CDCl<sub>3</sub>) δ 160.9, 155.0, 137.7, 128.8, 127.9, 127.9, 84.3, 61.7, 44.2, 27.8.

Lit.<sup>5</sup> <sup>1</sup>H NMR (400 MHz, CDCl<sub>3</sub>) δ 7.25-7.35 (m, 5H), 4.67 (d, *J* 3.2, 1H), 4.45 (s, 2H), 4.21 (d, *J* 3.2, 1H), 1.30 (s, 6H); <sup>13</sup>C NMR (100 MHz, CDCl<sub>3</sub>) δ 160.8, 154.8, 137.6, 128.6, 127.7, 127.7, 84.1, 61.5, 44.1, 27.6.

The spectra are included at the end of this ESI.

The preliminary results are summarised in Table S1

**Table S1** Conversion (%) of **1a** to **2a** using various catalysts and solvents at 50 °C<sup>[a,b]</sup>

| No. | Catalyst | MeCN | DMSO | EtOH | THF <sup>[c]</sup> | Toluene |
|-----|----------|------|------|------|--------------------|---------|
| 1   | MTBD     | 100  | 100  | 45   | 7                  | 19      |
| 2   | TBD      | 39   | 56   | 19   |                    | 36      |
| 3   | TMG      | 50   | 96   | 92   | 0                  | 1       |
| 4   | DBU      | 100  | 64   | 28   |                    | 0       |
| 5   | DABCO    | 3    | 2    | 3    |                    | 1       |
| 6   | DMAP     | 4    | 1    | 19   |                    | 1       |

[a] Reaction were performed using 0.3 mmol of **1a** and 10 mol% catalyst in 1.0 mL of the specified solvent under 5 bar of CO<sub>2</sub> at 50 °C; [b] Conversion was determined using <sup>1</sup>H NMR of the crude product; [c] reaction at 75 °C.

**Table S2** Solvents in this study and their polarity parameters

| No. | Solvent | Dielectric constant <sup>6</sup> | <i>E</i> <sub>T</sub> (30) <sup>7</sup> |
|-----|---------|----------------------------------|-----------------------------------------|
| 1   | MeCN    | 36.64                            | 45.6                                    |
| 2   | DMSO    | 47.24                            | 45.1                                    |
| 3   | EtOH    | 25.3                             | 51.9                                    |
| 4   | Toluene | 2.39                             | 33.9                                    |

### Typical Procedure for Catalytic Reaction between **1a** and CO<sub>2</sub> using MTBD and TMG as Catalyst

A solution of benzyl-(1,1-dimethylprop-2-ynyl)amine **1a** (0.15 g, 0.866 mmol, 1 equiv.) in the selected solvent (3 mL) was prepared in a vial under nitrogen. The catalyst (0.0868 mmol, 0.1 equiv. / 0.00868 mmol, 0.01 equiv.) was added to the reaction. A stainless steel high pressure reaction vessel was flushed with CO<sub>2</sub> and the solution injected into the cell. The vessel was further flushed with CO<sub>2</sub> and heated to 75 °C. After thermal equilibrium was reached the vessel was pressurised to 5 bar and stirred for 18 h. The vessel was cooled, vented through solvent and reaction solvent removed under vacuum. Reaction in DMSO required an extraction: reaction mixture diluted with H<sub>2</sub>O (30 ml) washed with diethyl ether (3 x 40 mL) ether, washed with water (70 mL), and dried over MgSO<sub>4</sub>. The organic solution was filtered and solvent evaporated under vacuum to give the crude product.

The CO<sub>2</sub> in these reactions was supplied from high purity grade BOC bottle (99.99%), which was liquefied using an Isco 260D syringe pump before transferring to the reaction vessel.

The results are summarised in Table 3 of the manuscript.

Some results under seemingly similar conditions are different between Table S1 and S3. This is due to both the different temperature and the much higher purity of CO<sub>2</sub> (no moisture) employed in experiments in Table 3.

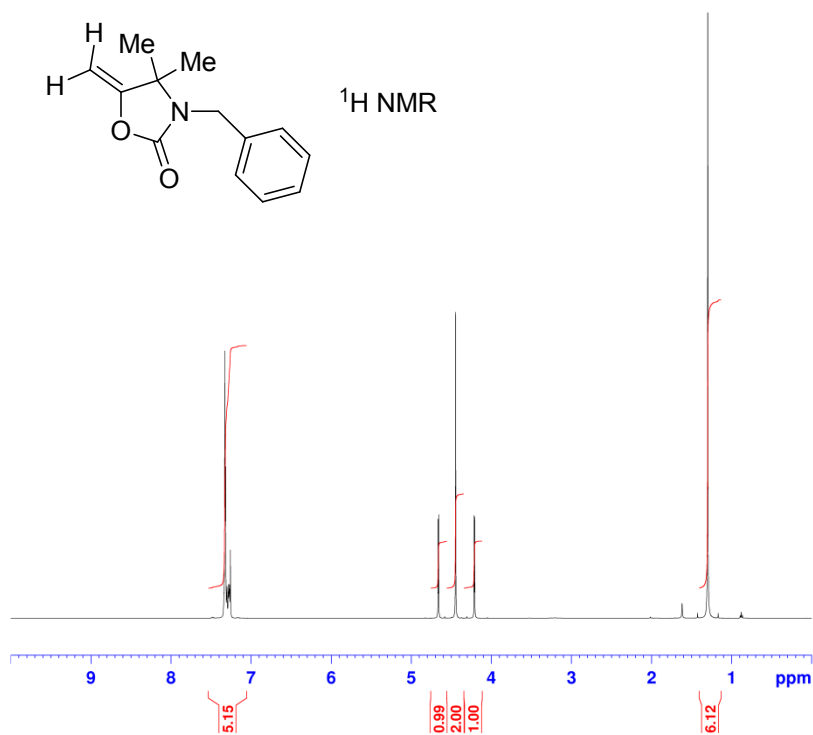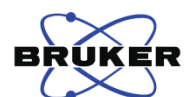

Current Data Parameters  
 NAME RN-01-029p7  
 EXPNO 10  
 PROCNO 1

F2 - Acquisition Parameters  
 Date\_ 20140331  
 Time 13.59  
 INSTRUM avance500  
 PROBHD 5 mm BBI 1H-BB  
 PULPROG zg30  
 TD 32768  
 SOLVENT CDCl3  
 NS 32  
 DS 2  
 SWH 7507.507 Hz  
 FIDRES 0.229111 Hz  
 AQ 2.1823487 sec  
 RG 90.5  
 DW 66.600 usec  
 DE 6.50 usec  
 TE 300.0 K  
 D1 2.4900001 sec  
 TDO 1

===== CHANNEL f1 =====  
 NUC1 1H  
 P1 6.50 usec  
 PL1 -1.00 dB  
 SFO1 500.2327513 MHz

F2 - Processing parameters  
 SI 32768  
 SF 500.2300160 MHz  
 WDW EM  
 SSB 0  
 LB -0.15 Hz  
 GB 0  
 PC 1.00

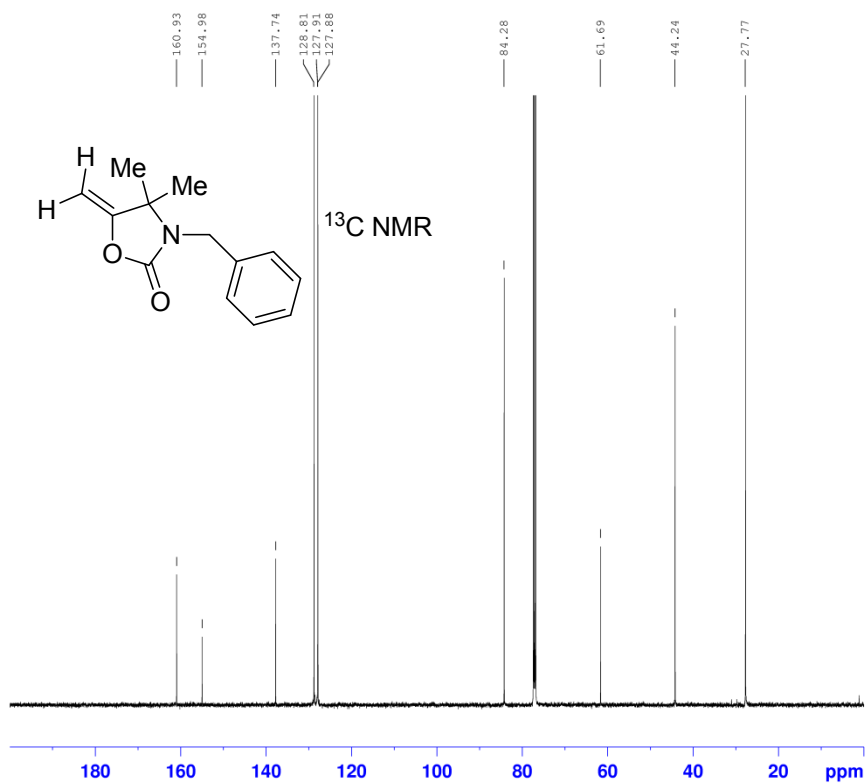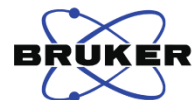

Current Data Parameters  
 NAME RN-01-029p5  
 EXPNO 10  
 PROCNO 1

F2 - Processing parameters  
 SI 32768  
 SF 125.8684114 MHz  
 WDW EM  
 SSB 0  
 LB 1.00 Hz  
 GB 0  
 PC 1.40



## References

1. B. Pangborn, M. A. Giardello, R. H. Grubbs, R. K. Rosen and F. J. Timmers, *Organometallics*, 1996, 15, 1518-1520.
2. Gabriele, P. Plastina, G. Salerno, R. Mancuso and M. Costa, *Org. Lett.*, 2007, 9, 3319-3322.
3. *US Pat.*, US2012/46437 A1, 2012.
4. M. J. Frisch, G. W. Trucks, H. B. Schlegel, G. E. Scuseria, M. A. Robb, J. R. Cheeseman, G. Scalmani, V. Barone, B. Mennucci, G. A. Petersson, H. Nakatsuji, M. Caricato, X. Li, H. P. Hratchian, A. F. Izmaylov, J. Bloino, G. Zheng, J. L. Sonnenberg, M. Hada, M. Ehara, K. Toyota, R. Fukuda, J. Hasegawa, M. Ishida, T. Nakajima, Y. Honda, O. Kitao, H. Nakai, T. Vreven, J. A. M. Jr., J. E. Peralta, F. Ogliaro, M. Bearpark, J. J. Heyd, E. Brothers, K. N. Kudin, V. N. Staroverov, R. Kobayashi, J. Normand, K. Raghavachari, A. Rendell, J. C. Burant, S. S. Iyengar, J. Tomasi, M. Cossi, N. Rega, J. M. Millam, M. Klene, J. E. Knox, J. B. Cross, V. Bakken, C. Adamo, J. Jaramillo, R. Gomperts, R. E. Stratmann, O. Yazyev, A. J. Austin, R. Cammi, C. Pomelli, J. W. Ochterski, R. L. Martin, K. Morokuma, V. G. Zakrzewski, G. A. Voth, P. Salvador, J. J. Dannenberg, S. Dapprich, A. D. Daniels, Ö. Farkas, J. B. Foresman, J. V. Ortiz, J. Cioslowski and D. J. Fox, *Gaussian 09*, (2009) Gaussian, Inc., Wallingford CT.
5. M. Yoshida, T. Mizuguchi, K. Shishido, *Chem.-Eur. J.*, 2012, 18, 1699.
6. J. A. Dean, *Lange's Handbook of Chemistry*, 15th edn., McGraw-Hill, 1999.
7. J. Adams, P. J. Dyson and S. J. Taverner, *Chemistry In Alternative Reaction Media*, Wiley, 2003.
